# Supplementary material for: Current status of use of high throughput nucleotide sequencing in rheumatology
Source: HighWire-hosted journal article supplement (doi:10.1136/rmdopen-2020-001324), 2021-01-01

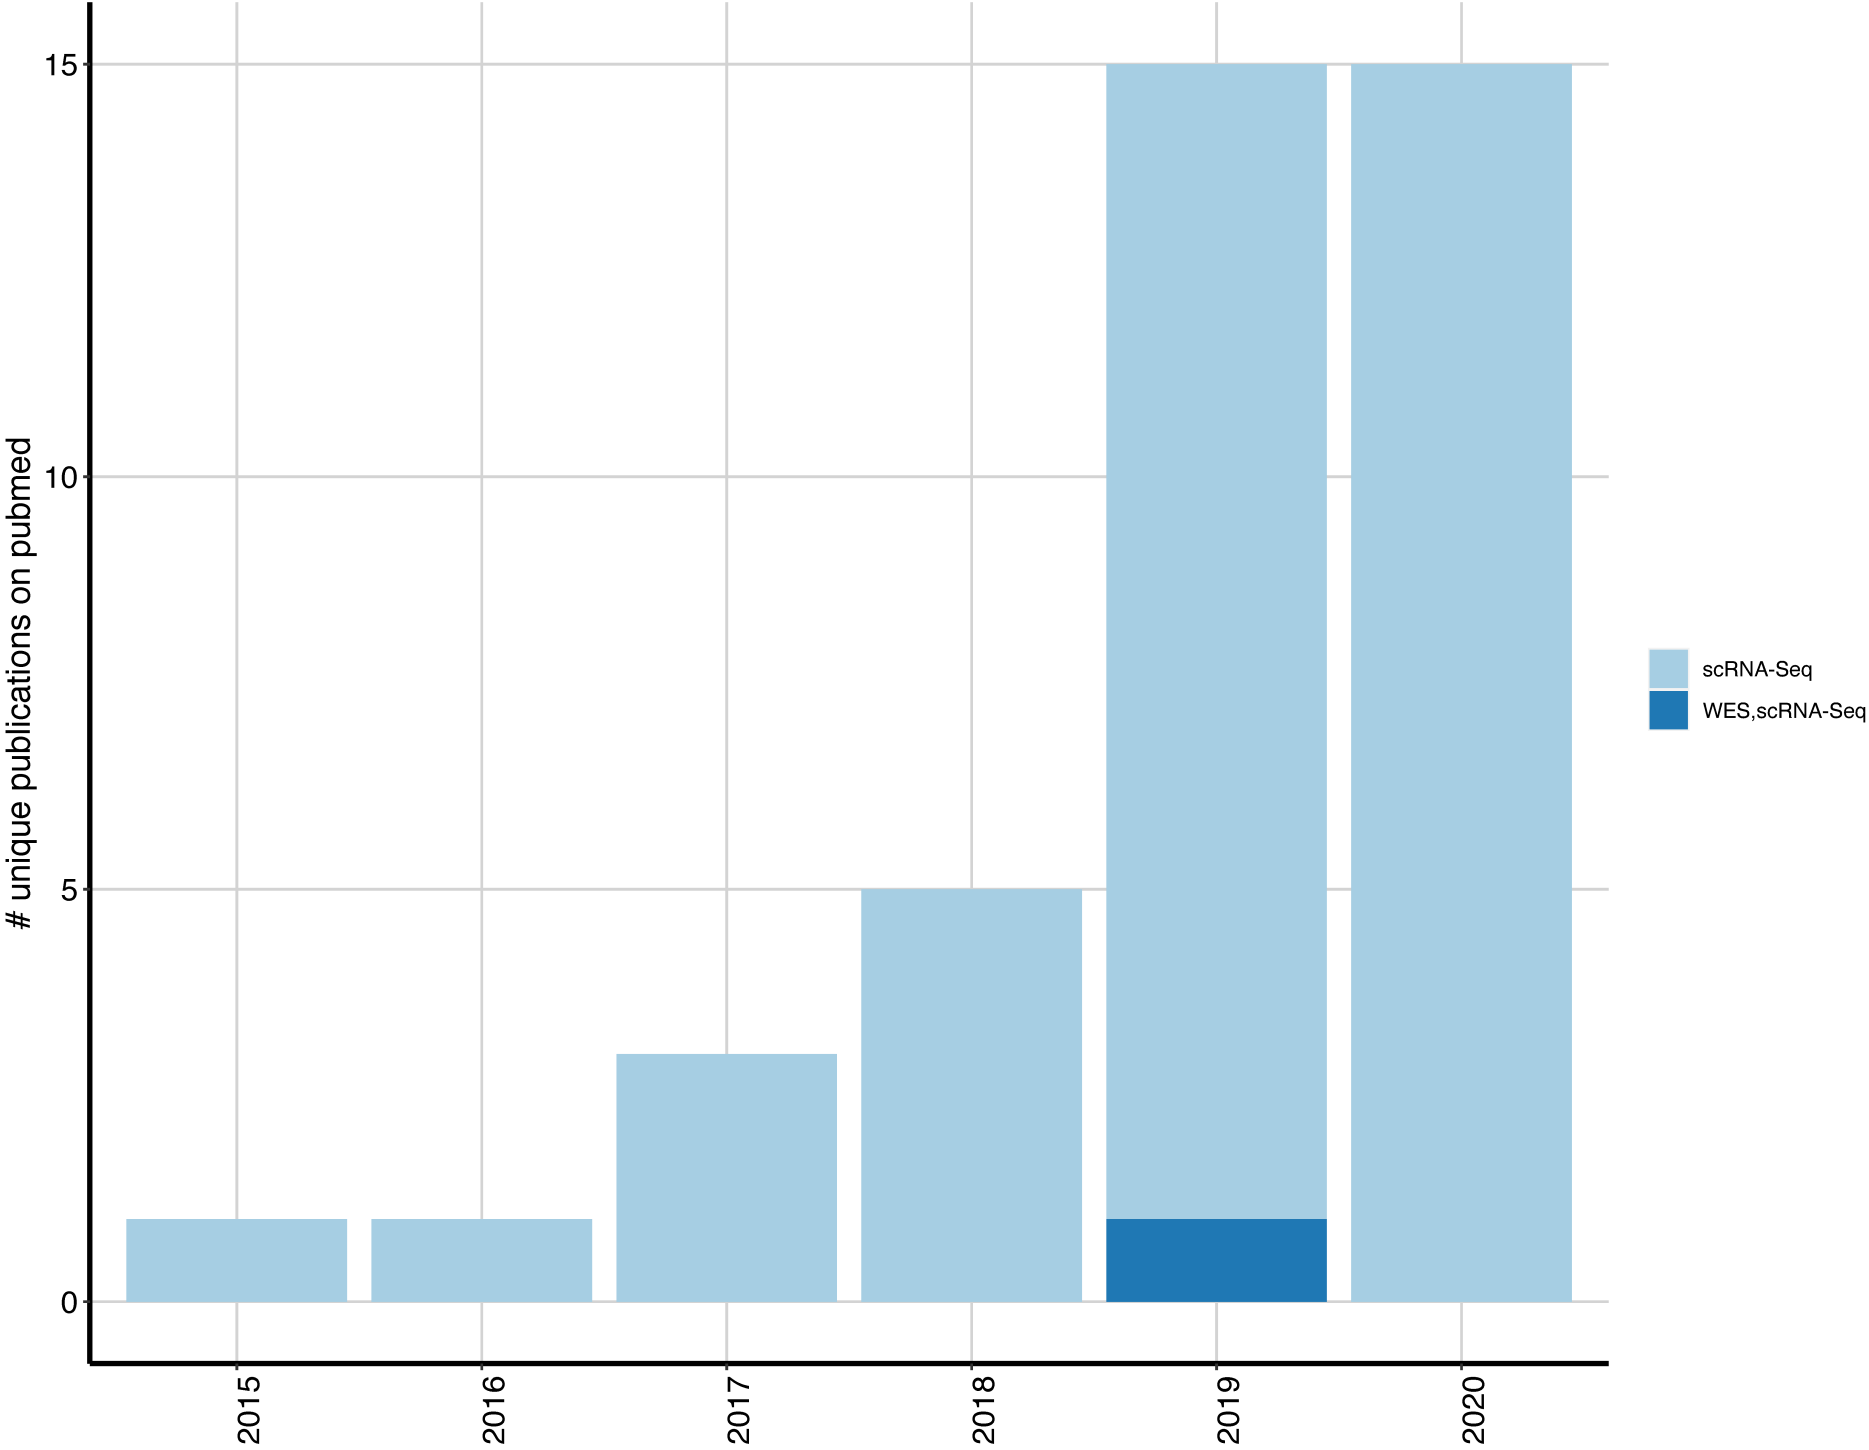

Supplement: rmdopen-2020-001324supp003_data_supplement.pdf [file rmdopen-2020-001324supp003_data_supplement.pdf]
